# Supplementary material for: Colorimetric determination of biothiols with AuNPs@MoS2 NSs as a peroxidase mimetic enzyme
Source: Royal Society of Chemistry journal article supplement (doi:10.1039/d2nj03052g), 2022-01-01
Supplement: d2nj03052g1.pdf [file d2nj03052g1.pdf]

*Electronic supplementary information (ESI)*

**Colorimetric determination of biothiols with AuNPs@MoS<sub>2</sub> NSs  
as peroxidase mimetic enzyme**

Rui Shi, Jin Yang, Shiqi Chen, Shangying Qin, Li Huang, Yilin Wang\* and Yuanjin Xu

School of Chemistry and Chemical Engineering, Guangxi University, Nanning 530004, P.R. China

**Content**

|                                   |           |
|-----------------------------------|-----------|
| <b>Experimental Section</b> ..... | <b>1</b>  |
| <b>Fig.S1</b> .....               | <b>2</b>  |
| <b>Fig.S2</b> .....               | <b>3</b>  |
| <b>Fig.S3</b> .....               | <b>4</b>  |
| <b>Fig.S4</b> .....               | <b>5</b>  |
| <b>Fig.S5</b> .....               | <b>6</b>  |
| <b>Fig.S6</b> .....               | <b>7</b>  |
| <b>Table S1</b> .....             | <b>8</b>  |
| <b>Table S2</b> .....             | <b>9</b>  |
| <b>Table S3</b> .....             | <b>10</b> |

**References .....11**

## Experimental Section

### Kinetic assay

The steady-state kinetic parameters were examined to analyze the catalytic performance of AuNPs@MoS<sub>2</sub> NSs. The experiment was performed by varying the concentration of H<sub>2</sub>O<sub>2</sub> from 0.02 to 0.12 mmol·L<sup>-1</sup> while the TMB concentration was fixed at 1.0 mmol·L<sup>-1</sup>. The experiment was also conducted by varying the working concentration of TMB from 0.2 to 1.2 mmol·L<sup>-1</sup> while the working concentration of H<sub>2</sub>O<sub>2</sub> was fixed at 0.1 mmol·L<sup>-1</sup>. The absorbance of 652 nm of the reaction was recorded for 10 min (at an interval of 1 min). Then obtained the kinetic parameters by Lineweaver–Burk double-reciprocal formula from the Michaelis–Menten equation:

$$\frac{1}{V} = \frac{K_m}{V_{max}[S]} + \frac{1}{V_{max}}$$

in which  $V$  is the initial velocity,  $K_m$  is the Michaelis constant, and  $V_{max}$  is the maximal reaction velocity, and  $[S]$  is the concentration of substrate.

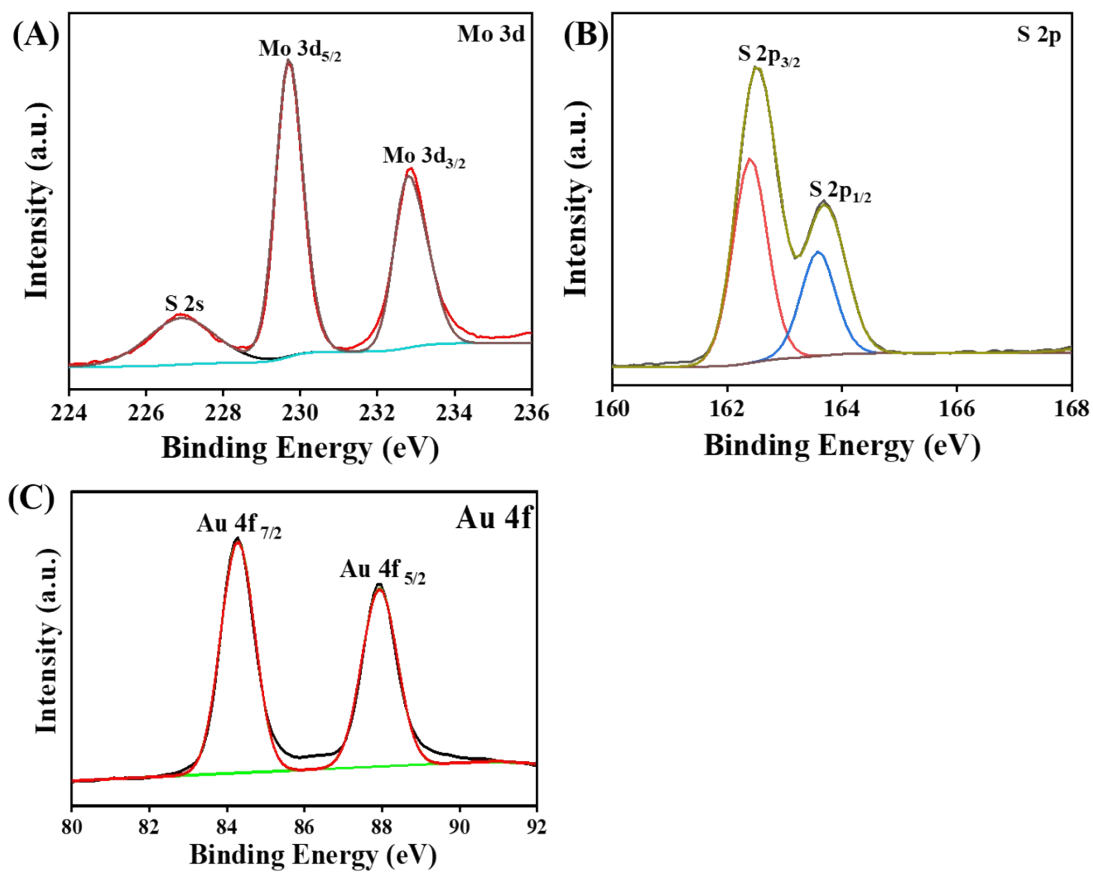

**Fig. S1** XPS high-resolution spectra of AuNPs@MoS<sub>2</sub> NSs: (A) Mo 3d, (B) S 2p and (C) Au

4f

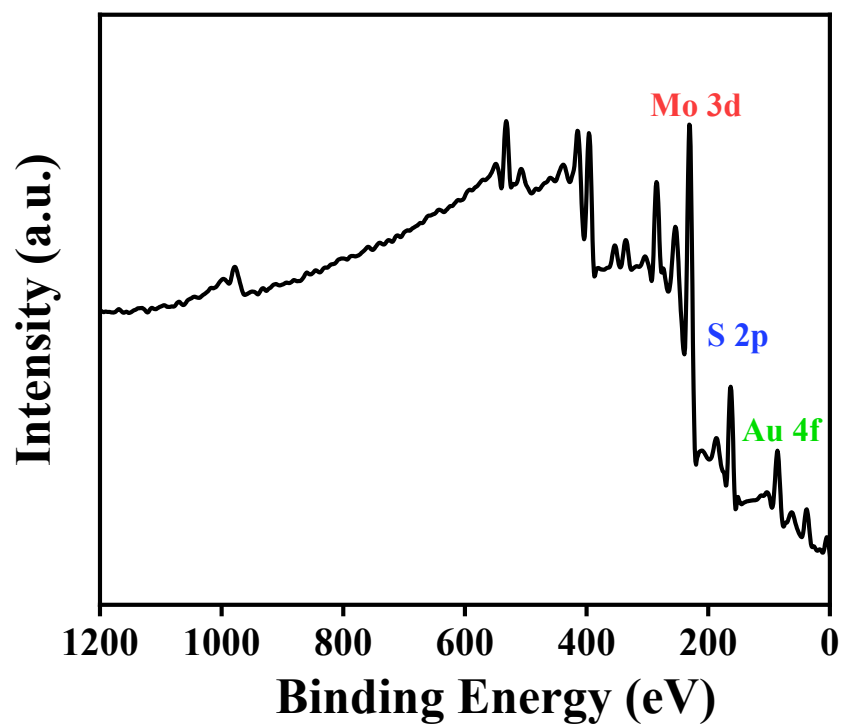

**Fig.S2** XPS spectra of AuNPs@MoS<sub>2</sub> NSs after the catalytic reaction

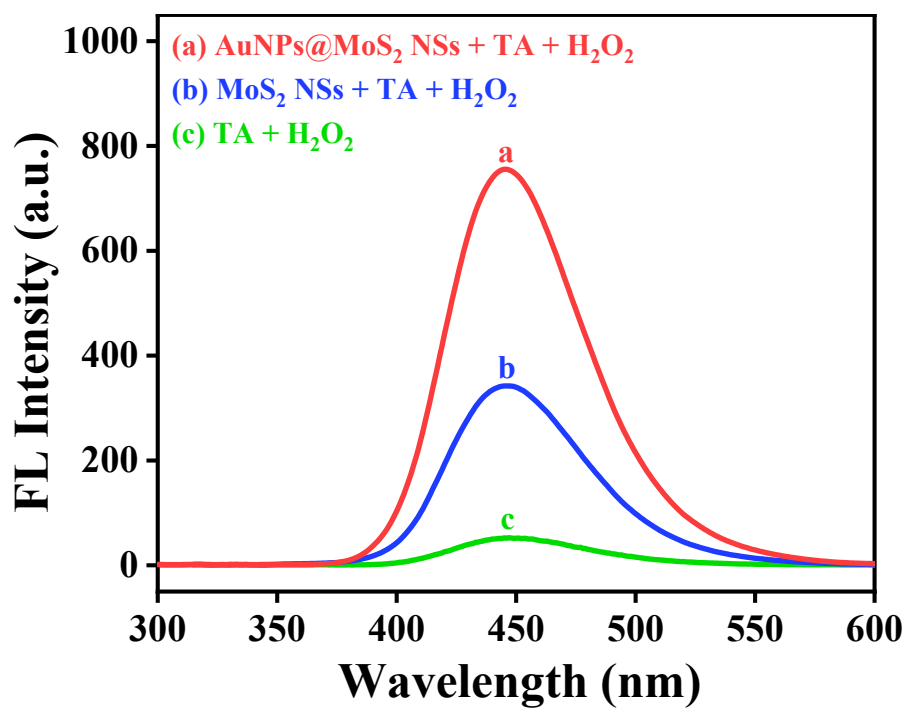

**Fig.S3** Fluorescence spectra of different reaction systems. Experimental conditions:  $1.0 \mu\text{g}\cdot\text{mL}^{-1}$  AuNPs@MoS<sub>2</sub> NSs or MoS<sub>2</sub> NSs;  $0.5 \text{ mmol}\cdot\text{L}^{-1}$  TA;  $1.0 \text{ mmol}\cdot\text{L}^{-1}$  H<sub>2</sub>O<sub>2</sub>; pH 4.0 HAC-NaAc buffer; incubated at 30 °C for 12 h (in dark).

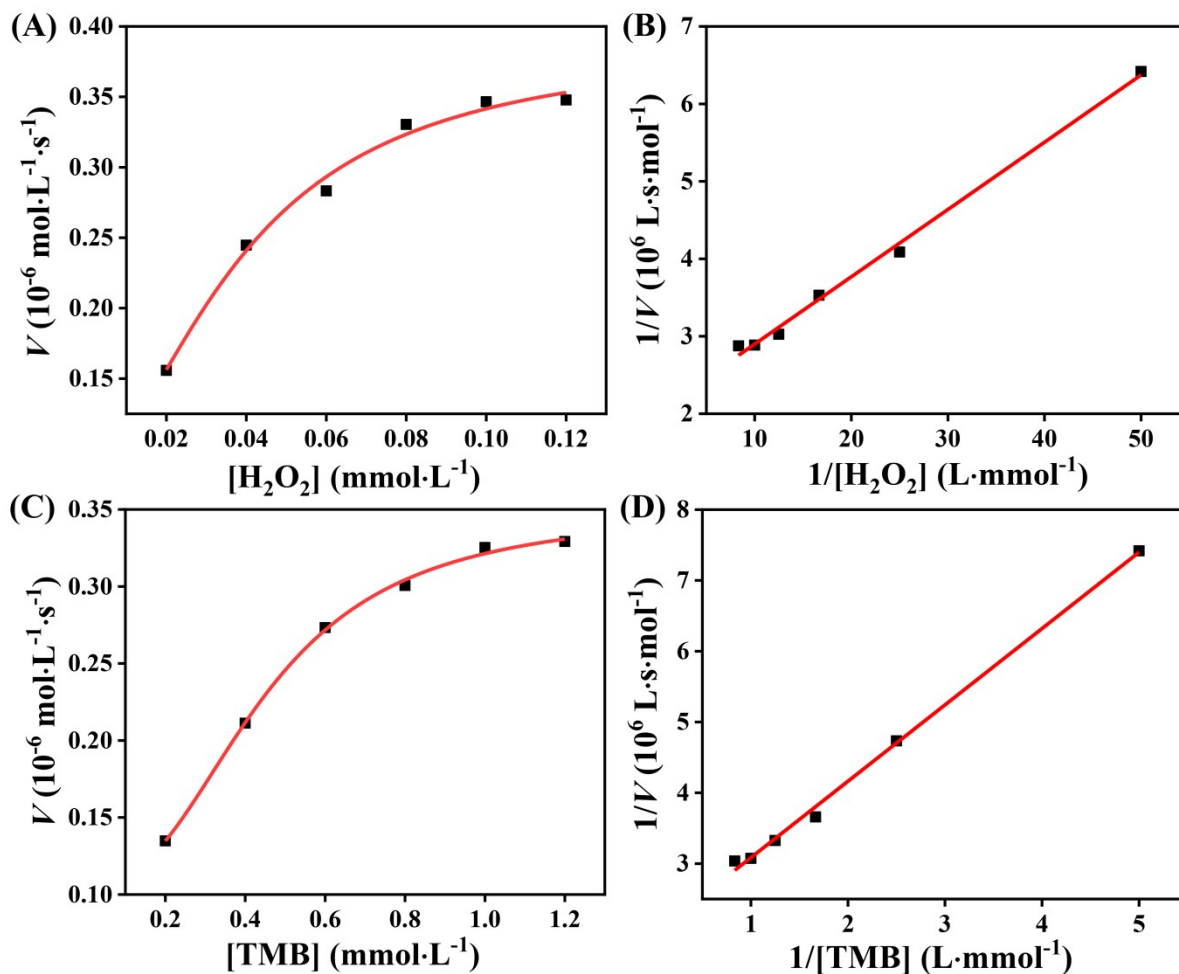

**Fig.S4** Steady-state kinetic assay of AuNPs@MoS<sub>2</sub> NSs by using (A, C) Michaelis-Menten curves and (B, D) Lineweaver-Burk plots. (A, B) The concentration of TMB was 1.0 mmol·L<sup>-1</sup> and H<sub>2</sub>O<sub>2</sub> concentration was varied. (C, D) The concentration of H<sub>2</sub>O<sub>2</sub> was 0.1 mmol·L<sup>-1</sup> and TMB concentration was varied.

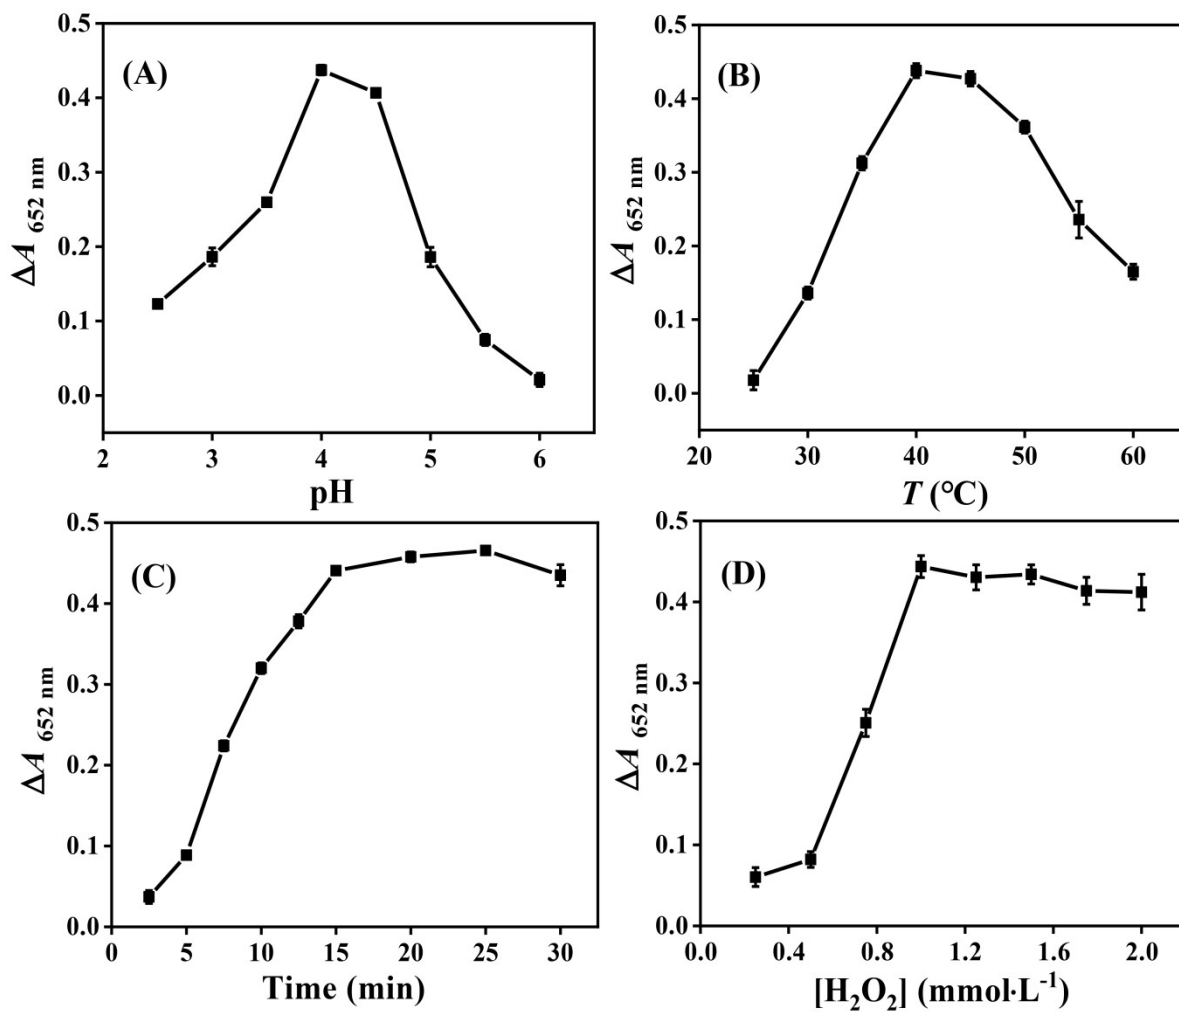

**Fig.S5** The effects of (A) pH value, (B) temperature, (C) time and (D) the concentration of H<sub>2</sub>O<sub>2</sub> on the catalytic activity AuNPs@MoS<sub>2</sub> NSs. Experimental conditions: 1.0 μg·mL<sup>-1</sup> AuNPs@MoS<sub>2</sub> NSs; 1.0 mmol·L<sup>-1</sup> TMB; 50 μmol·L<sup>-1</sup> Hcy.



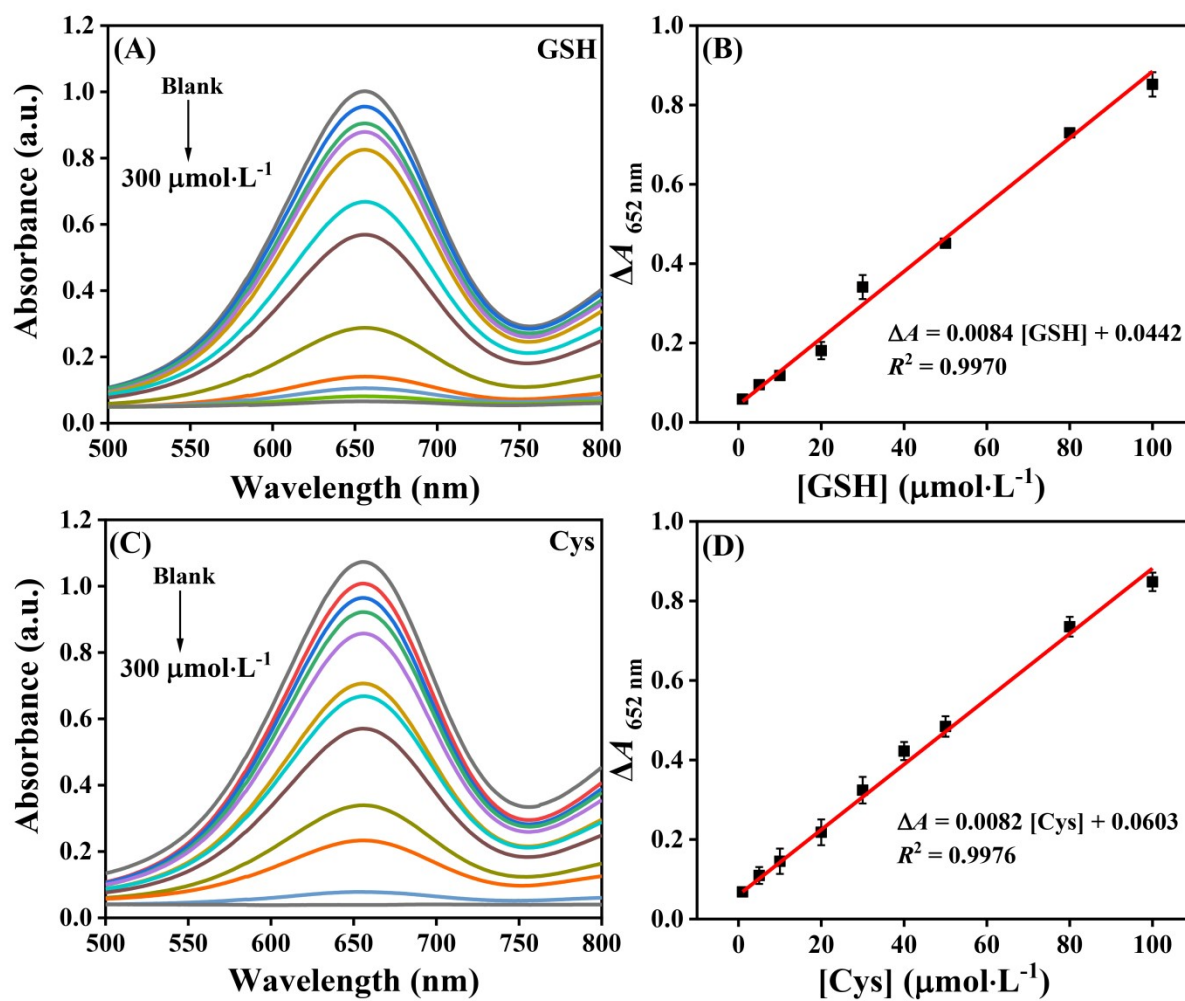

**Fig.S6** UV-vis absorption spectra in the presence of various (A) GSH, (C) Cys concentrations.

The linear relationship between  $\Delta A_{652 \text{ nm}}$  and (B) GSH, (D) Cys concentration

**Table S1** Comparison of the kinetic parameters of AuNPs@MoS<sub>2</sub> NSs, HRP and MoS<sub>2</sub> NSs.

| Materials                  | $K_m$ (mmol·L <sup>-1</sup> ) |                               | $V_{max}$ (10 <sup>-8</sup> mol·L <sup>-1</sup> ·s <sup>-1</sup> ) |                               | Ref.      |
|----------------------------|-------------------------------|-------------------------------|--------------------------------------------------------------------|-------------------------------|-----------|
|                            | TMB                           | H <sub>2</sub> O <sub>2</sub> | TMB                                                                | H <sub>2</sub> O <sub>2</sub> |           |
| VS <sub>2</sub> NSs        | 0.28                          | 3.49                          | 0.416                                                              | 0.557                         | 1         |
| GQDs                       | 8                             | 0.01                          | 0.117                                                              | 7.3                           | 2         |
| PPy NPs                    | 0.293                         | 0.184                         | 2.99                                                               | 3.65                          | 3         |
| M-CQDs                     | 0.219                         | 0.431                         | 0.882                                                              | 0.046                         | 4         |
| HRP                        | 0.434                         | 3.702                         | 10.0                                                               | 8.71                          | 5         |
| MoS <sub>2</sub> NSs       | 0.082                         | 2.30                          | 7.86                                                               | 9.86                          | 6         |
| AuNPs@MoS <sub>2</sub> NSs | 0.043                         | 0.537                         | 49.2                                                               | 49.8                          | This work |

**Table S2** Comparison of performance of colorimetric method for Hcy, GSH and Cys detection.

| Target | Nanomaterials                                     | Linear range ( $\mu\text{mol}\cdot\text{L}^{-1}$ ) | LOD ( $\mu\text{mol}\cdot\text{L}^{-1}$ ) | Ref.      |
|--------|---------------------------------------------------|----------------------------------------------------|-------------------------------------------|-----------|
| Hcy    | MIL-53(Fe)                                        | 0.3 ~ 20                                           | 0.1                                       | 7         |
|        | IrO <sub>2</sub> /rGO                             | 0.1 ~ 50                                           | 0.083                                     | 8         |
|        | Silver halides                                    | 10 ~ 100                                           | 9.0                                       | 9         |
|        | Cu <sub>2</sub> (OH) <sub>3</sub> NO <sub>3</sub> | 5 ~ 40                                             | 0.099                                     | 10        |
|        | Ce-MOF                                            | 0 ~ 40                                             | 0.143                                     | 11        |
|        | AuNPs@MoS <sub>2</sub> NSs                        | 1 ~ 100                                            | 0.93                                      | This work |
| GSH    | NiO NFs                                           | 20 ~ 100                                           | 1.1                                       | 12        |
|        | TiO <sub>2</sub> /MoS <sub>2</sub>                | 0.05 ~ 1                                           | 0.05                                      | 13        |
|        | Por-ZnFe <sub>2</sub> O <sub>4</sub> /rGO         | 2 ~ 40                                             | 0.76                                      | 14        |
|        | CDs@ZIF-8-a                                       | 0 ~ 100                                            | 1.04                                      | 15        |
|        | Pt <sub>10</sub> -LP NCs                          | 4 ~ 140                                            | 0.37                                      | 16        |
|        | AuNPs@MoS <sub>2</sub> NSs                        | 1 ~ 100                                            | 0.71                                      | This work |
| Cys    | VS <sub>4</sub>                                   | 5 ~ 100                                            | 2.5                                       | 17        |
|        | rGO-GP                                            | 2 ~ 30                                             | 0.1                                       | 18        |
|        | 0.10CeO <sub>2</sub> /CoO NC                      | 5 ~ 10                                             | 3.71                                      | 19        |
|        | CB-CQDs                                           | 0.5 ~ 20                                           | 0.4                                       | 20        |
|        | MOF Eu-pydc                                       | 0 ~ 4                                              | 0.28                                      | 21        |
|        | AuNPs@MoS <sub>2</sub> NSs                        | 1 ~ 100                                            | 0.73                                      | This work |

**Table S3** Determination of Hcy in healthy volunteers' serum samples

| Samples | Added ( $\mu\text{mol}\cdot\text{L}^{-1}$ ) | Total found ( $\mu\text{mol}\cdot\text{L}^{-1}$ ) | Recovery (%) | RSD ( $n = 3$ , %) |
|---------|---------------------------------------------|---------------------------------------------------|--------------|--------------------|
| 1       | 10.0                                        | 10.03                                             | 100.3        | 4.1                |
|         | 50.0                                        | 50.22                                             | 100.4        | 2.3                |
| 2       | 10.0                                        | 9.825                                             | 98.25        | 3.3                |
|         | 50.0                                        | 50.58                                             | 101.2        | 3.9                |
| 3       | 10.0                                        | 9.773                                             | 97.73        | 4.0                |
|         | 50.0                                        | 50.17                                             | 100.3        | 2.4                |

## References

- 1 L. J. Huang, W. X. Zhu, W. T. Zhang, K. Chen, J. Wang, R. Wang, Q. F. Yang, N. Hu, Y. R. Suo, J. L. Wang, *Microchimica Acta*, 2017, **185**, 7–14
- 2 N. R. Nirala, S. Abraham, V. Kumar, A. Bansal, A. Srivastava, P. S. Saxena, *Sensors Actuators B: Chem.*, 2015, **218**, 42–50.
- 3 C. Y. Hong, X. X. Zhang, C. Y. Wu, Q. Chen, H. F. Yang, D. Yang, Z. Y. Huang, R. Cai, W. H. Tan, *ACS Appl. Mater. Interfaces*, 2020, **12**, 54426–54432.
- 4 C. Subhash, K. S. Vikas, K. Y. Pradeep, B. Daraksha, K. Vijay, K. P. Vinay, T. Mahe, H. H. Syed, *Anal. Chim. Acta*, 2019, **1054**, 145–156.
- 5 L. Z. Gao, J. Zhuang, L. Nie, J. B. Zhang, Y. Zhang, N. Gu, T. H. Wang, J. Feng, D. L. Yang, S. Perrett and X. Y. Yan, *Nat. Nanotechnol.*, 2007, **2**, 577–583.
- 6 R. Shi, Q. L. He, S. Q. Cheng, B. L. Chen and Y. L. Wang, *New J. Chem.*, 2021, **45**, 18048–18053.
- 7 Y. Jiang, Q. M. Yang, Q. J. Xu, S. Y. Lu, L. Y. Hu, M. W. Xu and Y. S. Liu, *Anal. Biochem.*, 2019, **577**, 82–88.
- 8 X. L. Liu, X. H. Wang, Q. S. Han, C. Qi, C. Wang and R. Yang, *Talanta*, 2019, **203**, 227–234.
- 9 F. A. Kappi, G. A. Papadopoulos, G. Z. Tsogas and D. L. Giokas, *Talanta*, 2017, **172**, 15–22.
- 10 J. C. Munyemana, J. Chen, X. Wei, M. C. Ali, Y. X. Han, H. D. Qiu, *Anal. Bioanal. Chem.*, 2020, **412**, 4629–4638.
- 11 Y. H. Xiong, S. H. Chen, F. G. Ye, L. J. Su, C. Zhang, S. F. Shen, S. L. Zhao, *Chem. Commun.*, 2015, **51**, 4635–4638.
- 12 C. Ray, S. Dutta, S. Sarkar, R. Sahoo, A. Roy and T. Pal, *J Mater Chem B*, 2014, **2**, 6097–6105.

- 13 W. D. Zhu, M. Q. Chi, M. Gao, C. Wang and X. F. Lu *J. Colloid Interface Sci.*, 2018, **528**, 410–418.
- 14 B. Bian, Q. Y. Liu and S. T. Yu, *Colloids Surf. B. Biointerfaces*, 2019, **181**, 567–575.
- 15 Yu. F. Wang, X. S. Liu, M. K. Wang, X. X. Wang, W. Y. Ma, J. Y. Li, *Sensors Actuators B: Chem.*, 2019, 329, 129115–129123.
- 16 L. Y. Fan, X. B. Ji, G. Q. Lin, K. Liu, S. F. Chen, Gu. L. Ma, W. L. Xue, X. Y. Zhang, L. G. Wang, *Microchem. J.*, 2021, **166**, 106202–106209.
- 17 C. Chen, Y. Wang and D. Zhang, *Microchim. Acta*, 2019, **186**, 784–791.
- 18 C. Liu, Y. M. Zhao, D. Xu, X. X. Zheng and Q. Huang, *Anal. Bioanal. Chem.*, 2021, **413**, 4013–4022.
- 19 J. J. Lian, P. Liu, C. Q. Jin, Q. Y. Liu, X. X. Zhang and X. Zhang, *ACS Sustainable Chem. Eng.*, 2020, **8**, 17540–17550.
- 20 C. L. Yuan, Q. Xiu, Y. J. Xu, X. P. Li, Y. Y. Chen, R. Shi, Y. L. Wang, *J. Photochem. Photobiol., A*, 2020, **396**, 112529–112535.
- 21 L. Wang, Y. Ling, L. Han, J. Zhou, Z. Sun, N. B. Li, H. Q. Luo, *Anal. Chim. Acta*, 2020, **1131**, 118–125.
